# Supplementary material for: Common Running Musculoskeletal Injuries and Associated Factors among Recreational Gorge Marathon Runners: An Investigation from 2013 to 2018 Taroko Gorge Marathons
Source: MDPI journal article supplement (doi:10.3390/ijerph17218101), 2020-11-03
Supplement: s1 [file s1]

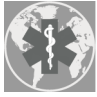

## Supplementary file: Questionnaires

### Sports Injury Survey Questionnaire

1. Do you have experience in participating in the marathon: ☐No; ☐Yes, ☐ <1 year ☐ 1-2 years ☐  
2-3 years ☐ 3-4 years ☐ 4-5 years ☐ More than 5 years (marathon/half marathon also please note)
2. Number of times to participate in marathon: average \_\_\_\_\_ times/per week;  
\_\_\_\_\_ per month; \_\_\_\_\_ per year.
3. Normal running times: approximately \_\_\_\_\_ times/week or month; each time approximately \_\_\_\_\_  
kilometers or minutes.
4. Do you have experience in running a mountain road marathon: ☐No. ☐Yes, about times.
  - a. Have you received special training or planned training? ☐No; ☐Yes,
  - b. Training method: \_\_\_\_\_  
Frequency: \_\_\_\_\_ times/week; about \_\_\_\_\_ kilometers or \_\_\_\_\_ hours each time.
5. Have you ever had sports injuries or pain (sore) problems:  
☐No; ☐Yes, in ☐Ankle joint ☐Knee joint ☐Hip joint ☐Low back  
☐Shoulder and neck joint ☐Upper limbs (elbows, wrists) ☐feet or toes ☐Calf muscles (tendons) ☐  
Thigh muscles (tendons) ☐Back muscles ☐Shoulder and neck muscles ☐Others: (multiple  
selection possible)
6. Is there any pain (sore) after this run:  
☐No; ☐ Yes, in ☐Ankle joint ☐Knee joint ☐Hip joint ☐Low back ☐Shoulder and neck joint ☐  
Upper limbs (elbows, wrists) ☐feet or toes ☐Calf muscles (tendons) ☐Thigh muscles  
(tendons) ☐Back muscles ☐Shoulder and neck muscles ☐Others: \_\_\_\_\_ (multiple choice)
7. Before this run, you spend about minutes warming up.  
warm up method: ☐Massage ☐stretch ☐Tapping ☐Other \_\_\_\_\_ (multiple choice),

\*site: ☐ankle joint ☐knee joint ☐hip joint ☐lower back ☐shoulder and neck joint ☐upper limb

(hand, Elbows, wrists) ☐Feet or toes Calf muscles /tendons ☐Thigh muscles/tendons/ ☐

Lower back muscles☐Shoulder and Neck muscles ☐Others:\_\_\_\_\_(multiple choice)

8. In your usual experience of running a marathon (including half marathons), the Taroko

(Mountain Road) Marathon and the Flatland Marathon will affect you: ☐No effect, ☐

Influence:

a. Location: ☐ankle joint ☐knee joint ☐hip joint ☐lower back ☐shoulder and neck joint ☐upper

limb (elbow, wrist) ☐feet or toe ☐calf muscle (tendon) ☐thigh muscle (tendon) ☐lower back

muscle ☐shoulder and neck muscles ☐other: (multiple choice)

b. ☐ It takes more time to warm up than usual, about \_\_\_\_\_minutes.

9. Do you know that the conference provides sports injury physical therapy services: ☐Yes; ☐No

10. You feel about the sports injury physiotherapy services provided by the conference: ☐not

satisfied ☐not satisfied ☐good (normal) ☐somewhat satisfied ☐very satisfied.

## 20\*\* Taroko Gorge Marathon

### Sports injury and physical therapy record sheet

Participant Number:\_\_\_\_\_ Gender: Male Female Age:\_\_\_\_\_ Height:\_\_\_\_\_ Weight:\_\_\_\_\_ Participating Mileage: Half Full

Education level: ☐ Elementary ☐ Junior High ☐ High School ☐ Junior College or Above ☐ Graduate School

Sports injury history: ☐ None ☐ Yes, site (indicated in the table below), first occurrence to date: \_\_\_\_\_years/\_\_\_\_\_month/\_\_\_\_\_week,

experienced process: continuous intermittent,

Have you received diagnosis and treatment: No Yes. Diagnosis: \_\_\_\_\_ Treatment: \_\_\_\_\_

| <b>Sports injury Hx.site ,pain site and treatment site</b>                                                                                                                                                                       | <b>protection and treatment items</b>                                                                                                                                                                                                                                                                                                                                                                                                                                                                                                                                                                                                                                                                                                                                                                                                                                                                                                                                                                                                                                                        |
|----------------------------------------------------------------------------------------------------------------------------------------------------------------------------------------------------------------------------------|----------------------------------------------------------------------------------------------------------------------------------------------------------------------------------------------------------------------------------------------------------------------------------------------------------------------------------------------------------------------------------------------------------------------------------------------------------------------------------------------------------------------------------------------------------------------------------------------------------------------------------------------------------------------------------------------------------------------------------------------------------------------------------------------------------------------------------------------------------------------------------------------------------------------------------------------------------------------------------------------------------------------------------------------------------------------------------------------|
| <p><b>black:</b> Sports injury Hx.<b>red:</b> Pain <b>blue:</b> Treatment site</p> <div style="text-align: center; margin-top: 20px;"> 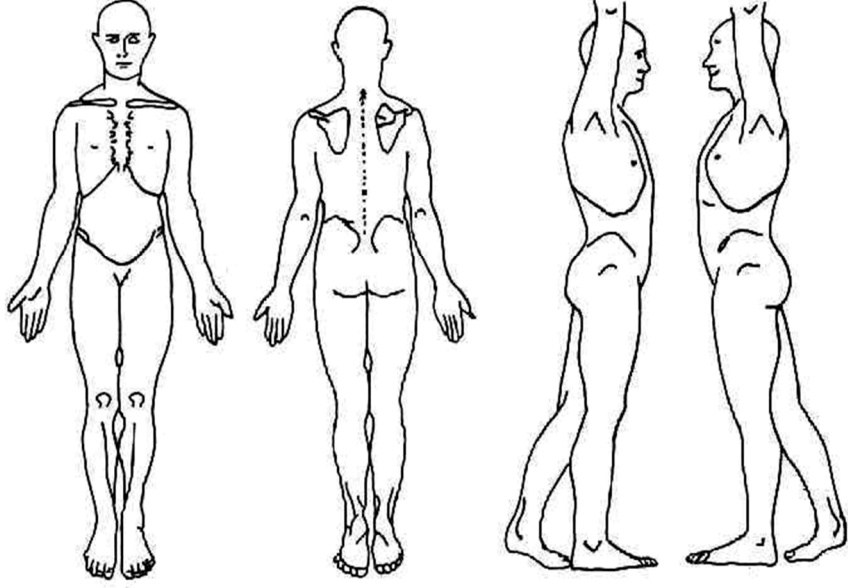 </div> | <p>Ice pack: <input type="checkbox"/> Ice bag x_____ <input type="checkbox"/> Ointment <input type="checkbox"/> Cold spray x_____</p> <p>Massage: <input type="checkbox"/> soft tissue massage and DFM <input type="checkbox"/> nerve point<br/>                           massage<input type="checkbox"/> lymphatic massage</p> <p>Stretch: <input type="checkbox"/> manual stretch    <input type="checkbox"/> education stretch</p> <p>Site: <input type="checkbox"/> Quadriceps <input type="checkbox"/> Posterior thigh muscles<input type="checkbox"/> ITB <input type="checkbox"/> Adductors<br/>               femoris<input type="checkbox"/> Gluteal muscles <input type="checkbox"/> Iliopsoas <input type="checkbox"/> Piriformis<input type="checkbox"/> Back muscles</p> <p><input type="checkbox"/> Anterior Calf muscles<input type="checkbox"/> Posterior calf muscles<input type="checkbox"/> Anterior neck<br/>               muscles <input type="checkbox"/> Posterior neck muscles<input type="checkbox"/> pectoralis muscles<input type="checkbox"/> Rotator cuff</p> |

Joint mobilization: ☐Lumbar and sacral spine☐Hip joint☐Knee joint  
☐Ankle joint☐cervical-thoracic spine☐Shoulder joint ☐Elbow joint  
☐Wrist joint

Tapping: ☐Athletic tape ☐Bandage ☐Leuko tap ☐Kinesio tap

Site: ☐feet ☐ankle ☐calf ☐knee ☐thigh ☐other\_\_\_\_\_

other: ☐ running shoe testing ☐ exercise guidance and pain

treatment consultation ☐\_\_\_\_\_

VAS scale: (pre-) /10, (post-) /10

GROC: -7, -6, -5, -4, -3, -2, -1, 0, +1, +2, +3, +4, +5, +6, +7

(-7: A very great deal worse, 0: About the same, +7: A very great deal better)

Signature of name:\_\_\_\_\_
